# Supplementary material for: Detection of Pneumocystis and Morphological Description of Fungal Distribution and Severity of Infection in Thirty-Six Mammal Species
Source: MDPI journal article supplement (doi:10.3390/jof9020220), 2023-02-07
Supplement: s1 [file s1]

**Figure S1.** Alignment of mtSSU rRNA sequences of the present study (NCBI accession numbers [acc. no.] OP738797-OP738809) with published mtSSU rRNA sequences of *P. canis* (NCBI acc. no. MT726216, MT726217), *P. oryctolagi* (NCBI acc. no. NC\_060319), *P. carinii* (NCBI acc. no. JX499145), *P. murina* (NCBI acc. no. JX499144), *P. sp. ludovicianus* (NCBI acc. no. MT726212), *P. sp. macacae* (NCBI acc. no. MT726214), and *P. jirovecii* (NCBI acc. no. JX855936) for confirmation of the affiliation to the genus *Pneumocystis*.

|              |                    | 10                                                  | 20 | 30 | 40 |    |
|--------------|--------------------|-----------------------------------------------------|----|----|----|----|
|              |                    | .... .... .... .... .... .... .... .... .... ..     |    |    |    |    |
| OP738797_P.  | sp. bovis          | CCACAAAAGTTTCTACAATAGGATGCAAAGATATATTTTACAAAGTCA    |    |    |    |    |
| OP738798_P.  | sp. ovis           | CCACAAAAGTTTCCACAATAGGATGCAAAGATATATTTTACAAAGTCA    |    |    |    |    |
| OP738799_P.  | sp. caprum         | CCACAAAAGTTTCCACAATAGGATGCAAAGATATATTTTACAAAGTCA    |    |    |    |    |
| OP738800_P.  | sp. rupicaprum     | CCACAAAAGTTTCTACAATAGGATGCAAAGATATA--TGTAAGTCA      |    |    |    |    |
| OP738801_P.  | sp. suis           | CCACAAAAATTTCTACAATAGGATGCAAAGATGTATGT--AAGTCA      |    |    |    |    |
| OP738802_P.  | sp. suis           | CCACAAAAATTTCTACAATAGGATGCAAAGATGTATGT--AAGTCA      |    |    |    |    |
| OP738803_P.  | canis              | CTATAAAAATTTCTACAATAGGATGCAAAGAT--G---AAAATTT       |    |    |    |    |
| MT726217_P.  | canis_Ck1          | CTATAAAAATTTCTACAATAGGATGCAAAGAT--G---AAAATTT       |    |    |    |    |
| MT726216_P.  | canis_Ck2          | CTATAAAAATTTCTACAATAGGATGCAAAGAT--G---AAAATCA       |    |    |    |    |
| OP738804_P.  | sp. vespertilionis | CCACAAAGATTTTCAACAAAGGGATGCAAAAAAT--G---AAAATTA     |    |    |    |    |
| OP738805_P.  | sp. soricis        | CCACAAAGATTTTTTACAAAGGATGCAAAGAT--G---AAAGTTG       |    |    |    |    |
| OP738806_P.  | leporis            | CTACAAAAGTTTCTACAAAGGGAAGCAACAAT--G---AAAATTA       |    |    |    |    |
| OP738807_P.  | oryctolagi         | CTGCAAAAGTTTCTACAAAGGAAGCTAGAAT--G---AAAATTG        |    |    |    |    |
| NC_060319_P. | oryctolagi         | CTGCAAAAGTTTCTACAAAGGAAGCTAGAAT--G---AAAATTG        |    |    |    |    |
| OP738808_P.  | sp. equi           | CCACAAAAATTTCTACAATAGGATGCAAAGATATAATTATTAAGTCA     |    |    |    |    |
| OP738809_P.  | carinii            | CCACAAATATTTTCTACAAAGGGAAGCAAAGATG-----AAAGTCT      |    |    |    |    |
| JX499145_P.  | carinii            | CCACAAATATTTTCTACAAAGGGAAGCAAAGATG-----AAAGTCT      |    |    |    |    |
| JX499144_P.  | murina             | CCGCAAAAATTTCTACAATGGGAAGCAAAGAT--C---CAAGTCC       |    |    |    |    |
| MT726212_P.  | sp. ludovicianus   | CCACAAATGATTTCTACAATAGGAAGCAAAGATTTTA---AAAGTCA     |    |    |    |    |
| MT726214_P.  | sp. macacae        | CTGCAAAAGTTTCTACAATGGGATGCAAAGAT--T---AAAATCA       |    |    |    |    |
| JX855936_P.  | jirovecii          | CTGCAAAATTTTCTACAATGGGATGCAATGAT--G---AAAGTCG       |    |    |    |    |
|              |                    | 50                                                  | 60 | 70 | 80 | 90 |
| .            |                    | .. .... .... .... .... .... .... .... .... ....     |    |    |    |    |
| OP738797_P.  | sp. bovis          | GAGCTAATCCCAGAAAGAAATTAATGTACAGATAAGAAATCTGGAAC     |    |    |    |    |
| OP738798_P.  | sp. ovis           | GAGCTAATCCCTGAAAAGAACTAATGTACGGATAAGAAATCTGGAAC     |    |    |    |    |
| OP738799_P.  | sp. caprum         | GAGCTAATCCCTGAAAAGAAATTAATGTACGGATAAGAAATCTGGAAC    |    |    |    |    |
| OP738800_P.  | sp. rupicaprum     | GAGCTAATCCCTGAAAAGAAATTAATGTACAGATAAGAAATCTGGAAC    |    |    |    |    |
| OP738801_P.  | sp. suis           | GAGCTAAACCATGAAAGGAAATTAAGTACGGATAAGAAATCTGGAAC     |    |    |    |    |
| OP738802_P.  | sp. suis           | GAGCTAAACCATGAAAGGAAATTAAGTACGGATAAGAAATCTGGAAC     |    |    |    |    |
| OP738803_P.  | canis              | GAGCTAATCCCTGAAAAGAAATTTTCAGTACAGATAAGAGTCTGAAAC    |    |    |    |    |
| MT726217_P.  | canis_Ck1          | GAGCTAATCCCTGAAAAGAAATTTTCAGTACAGATAAGAGTCTGAAAC    |    |    |    |    |
| MT726216_P.  | canis_Ck2          | GAGCTAATCCCTGAAAGGAAATTTAAGTACAGATAAGAAATCTGAAAC    |    |    |    |    |
| OP738804_P.  | sp. vespertilionis | GAGCTAATCCT--TAAATAAAAATCATAGTTTCAGATAAGAAATCTGGAAC |    |    |    |    |
| OP738805_P.  | sp. soricis        | GAGCTAATCCT--TAAAGAAAAATTTTAGTTCCGAATAAGAAATCTGGAAC |    |    |    |    |
| OP738806_P.  | leporis            | GAGCTAATCCT--CAAAGGAAATTTTCAGTACGGATAAGAAATCTGGAAC  |    |    |    |    |
| OP738807_P.  | oryctolagi         | AAGCCAATCCT--CAAAGGAAATTTTAGTCCGAATAAGAAATCTGGAAC   |    |    |    |    |
| NC_060319_P. | oryctolagi         | AAGCCAATCCT--CAAAGGAAATTTTAGTCCGAATAAGAAATCTGGAAC   |    |    |    |    |
| OP738808_P.  | sp. equi           | GAGCTAATCCAAGAAAAGAAATTAATGTACAGATAAGAAATCTGGAAC    |    |    |    |    |
| OP738809_P.  | carinii            | GAGCTAATCCT--CAAAGGAAATTAAGTACGGATAAGAAATCTGGAAC    |    |    |    |    |
| JX499145_P.  | carinii            | GAGCTAATCCT--CAAAGGAAATTAAGTACGGATAAGAAATCTGGAAC    |    |    |    |    |
| JX499144_P.  | murina             | GAGCCAATCCT--TAAAGGAAATTAAGTACGGATAAGAAATCTGGAAC    |    |    |    |    |
| MT726212_P.  | sp. ludovicianus   | GAGCTAATCCCTGAAAGGAAATATAAGTACGGATAAGAAATCTGGAAC    |    |    |    |    |
| MT726214_P.  | sp. macacae        | GAGCTAATCCT--TAAAGATATTTTAGTCCGGATAAGTGCCTGGAAC     |    |    |    |    |
| JX855936_P.  | jirovecii          | GAGCTAATCCCCATAAGATTGTTTAGTCCGGATAAGTGCCTGGAAC      |    |    |    |    |

|                                | 100                                             | 110 | 120 | 130 | 140 |
|--------------------------------|-------------------------------------------------|-----|-----|-----|-----|
|                                | ... ... ... ... ... ... ... ... ...             |     |     |     |     |
| OP738797_P. sp. bovis          | TCGATTCTTTGAAGAAGGAATTGCTAGTAATCGTCTATCATACGAG  |     |     |     |     |
| OP738798_P. sp. ovis           | TCGATTCTTTGAAGAAGGAATTGCTAGTAATCGTCTATCACCATGAG |     |     |     |     |
| OP738799_P. sp. caprum         | TCGATTCTTTGAAGAAGGAATTGCTAGTAATCGTCTATCACCATGAG |     |     |     |     |
| OP738800_P. sp. rupicaprum     | TCGATTCTTTGAAGAAGGAATTGCTAGTAATCGTCTATCATCACGAG |     |     |     |     |
| OP738801_P. sp. suis           | TCGATTCTTTGAAGAAGGAATTGCTAGTAATCGTCTATCAGCATGAG |     |     |     |     |
| OP738802_P. sp. suis           | TCGATTCTTTGAAGAAGGAATTGCTAGTAATCGTCTATCAGCATGAG |     |     |     |     |
| OP738803_P. canis              | TCGATTCTTTGAAGATGGAATTGCTAGTAATCGTCTATCAGCATGAG |     |     |     |     |
| MT726217_P. canis_Ck1          | TCGATTCTTTGAAGATGGAATTGCTAGTAATCGTCTATCAGCATGAG |     |     |     |     |
| MT726216_P. canis_Ck2          | TCGATTCTTTGAAGATGGAATTGCTAGTAATCGTCTATCAGCATGAG |     |     |     |     |
| OP738804_P. sp. vespertilionis | TCGATTCTTTGAAGACGGAATTGCTAATAATCGTCTATCAGCATGAG |     |     |     |     |
| OP738805_P. sp. soricis        | TCGATTCTTTGAAGATGGAATTGCTAGTAATCGTCTATCAGCATGAG |     |     |     |     |
| OP738806_P. leporis            | TCGATTCTTTGAAGTTGGAATTGCTAGTAATCGTCTATCAGCAAGAG |     |     |     |     |
| OP738807_P. oryctolagi         | TCGGTTCTTTGAAGTTGGAATTGCTAGTAATCGTCTATCAGCAAGAG |     |     |     |     |
| NC_060319_P. oryctolagi        | TCGGTTCTTTGAAGTTGGAATTGCTAGTAATCGTCTATCAGCAAGAG |     |     |     |     |
| OP738808_P. sp. equi           | TCGATTCTTTGAAGAAGGAATTGCTAGTAATCGTCTATCACCATGAG |     |     |     |     |
| OP738809_P. carinii            | TCGATTCTTTGAAGAAGGAATTGCTAGTAATCGTTCATCATCAAGGA |     |     |     |     |
| JX499145_P. carinii            | TCGATTCTTTGAAGAAGGAATTGCTAGTAATCGTTCATCATCAAGGA |     |     |     |     |
| JX499144_P. murina             | TCGATTCTTTGAAGAAGGAATTGCTAGTAATCGTTCATCATCAAGGA |     |     |     |     |
| MT726212_P. sp. ludovicianus   | TCGATTCTTTGAAGCAGGAATTGCTAGTAATCGTCCATCAGCATGGG |     |     |     |     |
| MT726214_P. sp. macacae        | TCGGCTCTTTGAAGTTGGAATTGCTAGTAATCGTCTATCACCATGAG |     |     |     |     |
| JX855936_P. jirovecii          | TCGGCTCTTTGAAGTTGGAATTGCTAGTAATCGTCTATCATCATGAG |     |     |     |     |

|                                | 150                                             | 160 | 170 | 180 |
|--------------------------------|-------------------------------------------------|-----|-----|-----|
|                                | ... ... ... ... ... ... ... ... ... ...         |     |     |     |
| OP738797_P. sp. bovis          | ACGGTGAAACTATCATCTGTGATGTACTAACTACTCGTCAAGCGCAA |     |     |     |
| OP738798_P. sp. ovis           | ACGGTGAAACAATCATCTGTGATGTACTAACTACTCGTCAAGCGCAA |     |     |     |
| OP738799_P. sp. caprum         | ACGGTGAAACTATCATCTGTGATGTACTAACTACTCGTCAAGCGCAA |     |     |     |
| OP738800_P. sp. rupicaprum     | ACGGTGAAACTATCATCTGTGATGTACTAACTACTCGTCAAGCGCAA |     |     |     |
| OP738801_P. sp. suis           | ACGGTGAAACGACCATCTGTGATGTACTAACTACTCGTCAAGCGCAA |     |     |     |
| OP738802_P. sp. suis           | ACGGTGAAACGACCATCTGTGATGTACTAACTACTCGTCAAGCGCAA |     |     |     |
| OP738803_P. canis              | ACGGTGAAAGATAAATCTGTGATGTACTAACTACTCGTCAAGCGCGG |     |     |     |
| MT726217_P. canis_Ck1          | ACGGTGAAAGATAAATCTGTGATGTACTAACTACTCGTCAAGCGCGG |     |     |     |
| MT726216_P. canis_Ck2          | ACGGTGAAATAAAAATCTGTGATGTACTAACTACTCGTCAAGCGCGG |     |     |     |
| OP738804_P. sp. vespertilionis | ACGGTGAAACGCCATCTGTAAATGTACTAACTACTCGTCAAGCGCGG |     |     |     |
| OP738805_P. sp. soricis        | ACGGTGAAACAGTCATCTGTGATGTACTAACTACTCGTCAAGCGCAA |     |     |     |
| OP738806_P. leporis            | ACGGTGAAACTTCTATCTGTGATGTACTAACTACTCGTCAAGCGCGG |     |     |     |
| OP738807_P. oryctolagi         | ACGGTGAAACTTCTATCTGTGATGTACTAACTACTCGTCAAGCGCGG |     |     |     |
| NC_060319_P. oryctolagi        | ACGGTGAAACTTCTATCTGTGATGTACTAACTACTCGTCAAGCGCGG |     |     |     |
| OP738808_P. sp. equi           | ACGGTGAAACTATCATCTGTGATGTACTAACTACTCGTCAAGCGCAA |     |     |     |
| OP738809_P. carinii            | ACGGTGAAACGAACATCTGTGATGTACTAACTACTCGTCAAGCGCGA |     |     |     |
| JX499145_P. carinii            | ACGGTGAAACGAACATCTGTGATGTACTAACTACTCGTCAAGCGCGA |     |     |     |
| JX499144_P. murina             | ACGGTGAAACAAATATCTGTGATGTACTAACTACTCGTCAAGCGCAA |     |     |     |
| MT726212_P. sp. ludovicianus   | ACGGTGAAACGAACATCTGTGATGTACTAACTACTCGTCAAGCGCAG |     |     |     |
| MT726214_P. sp. macacae        | ACGGTGAATCTACCATCTGTGATGTACTAACTACTCGTCAAGCGCGG |     |     |     |
| JX855936_P. jirovecii          | ACGGTGAATCTTTTATCTGTGATGTACTAACTACTCGTCAAGCGCGG |     |     |     |

|                                | 190                                                                       | 200                | 210            | 220           | 230 |
|--------------------------------|---------------------------------------------------------------------------|--------------------|----------------|---------------|-----|
|                                | . . . . . . . . . . . . . . . . . . . . . . . . . . . . . . . . . . . . . |                    |                |               |     |
| OP738797_P. sp. bovis          | AAATTTTC                                                                  | AGGAAATATAAAGTTTA  | TACGTC         | TATTTCTTAAAGA | --  |
| OP738798_P. sp. ovis           | AAATTTT                                                                   | AGGGAATATCAAGTTTA  | TACGTC         | TATTTCTTAAAGA | --  |
| OP738799_P. sp. caprum         | AAATTTT                                                                   | AGGAAATATCAAGTTTA  | TACGTC         | TATTTCTTAAAGA | --  |
| OP738800_P. sp. rupicaprum     | AAATTAT                                                                   | AGGAAATATAAAGTTTA  | TACGTC         | TATTTCTTAAAGA | --  |
| OP738801_P. sp. suis           | AAATTTTT                                                                  | TAGGAAATATCAAGTATA | TACGTC         | TATTTCTTAGAGA | --  |
| OP738802_P. sp. suis           | AAATTTTT                                                                  | TAGGAAATATCAAGTATA | TACGTC         | TATTTCTTAGAGA | --  |
| OP738803_P. canis              | AAATTGATAAGAAATATCAAGTATA                                                 | TACGTC             | TATTTCTTAAAGA  | --            |     |
| MT726217_P.canis_Ck1           | AAATTGATAAGAAATATCAAGTATA                                                 | TACGTC             | TATTTCTTAAAGA  | --            |     |
| MT726216_P.canis_Ck2           | AAATTGATAAGAAATATCAAGTTTA                                                 | TACGTC             | TATTTCTTAAAGA  | --            |     |
| OP738804_P. sp. vespertilionis | AAATTTTATAGGGGATACTAAATTT                                                 | TACGTC             | TATTTCTTAGAGA  | --            |     |
| OP738805_P. sp. soricis        | AAATTTTT                                                                  | TAGGGAATACTAAGTTT  | TACGTC         | TATTTCTTAGAGA | --  |
| OP738806_P. leporis            | ATATTTTATAGGGAATATCAAGCTC                                                 | TGCGTC             | TATTCTCTAGAGA  | --            |     |
| OP738807_P. oryctolagi         | ATATTTTATAGGGAATATCAAGCTC                                                 | TGCGTC             | TATTCTCTAGAGA  | --            |     |
| NC_060319_P. oryctolagi        | ATATTTTATAGGGAATATCAAGCTC                                                 | TGCGTC             | TATTCTCTAGAGA  | --            |     |
| OP738808_P. sp. equi           | AAATTTT                                                                   | AGGGAATATCAAGTTTA  | TACGTC         | TATTTCTTAAAGA | --  |
| OP738809_P. carinii            | AAATCATTAAAGAAGTATCAAGTTGATTGAATTTAATTTCTAAAGAGT                          |                    |                |               |     |
| JX499145_P. carinii            | AAATCATTAAAGAAGTATCAAGTTGATTGAATTTAATTTCTAAAGAGT                          |                    |                |               |     |
| JX499144_P. murina             | AAATCATTAGGGGATATCAAGTTTTGAACGTCATCCCTTAGAAA                              |                    |                |               |     |
| MT726212_P. sp. ludovicianus   | AAATTGTTAGGAAATATCAAGTTTTATACGTCATTTTCTAGAGA                              |                    |                |               |     |
| MT726214_P. sp. macacae        | AAATTTTACAAGAAATCCAAGTTCT                                                 | TACGTC             | CAATTTCTTAGAGA | --            |     |
| JX855936_P. jirovecii          | AAATTTTTTAAAGAAATCAAGTTCT                                                 | TACGTC             | CAATTTCTTGAGA  | --            |     |

|                                | 240                                                                     | 250           | 260 | 270 | 280 |
|--------------------------------|-------------------------------------------------------------------------|---------------|-----|-----|-----|
|                                | . . . . . . . . . . . . . . . . . . . . . . . . . . . . . . . . . . . . |               |     |     |     |
| OP738797_P. sp. bovis          | -----                                                                   |               |     |     |     |
| OP738798_P. sp. ovis           | -----                                                                   |               |     |     |     |
| OP738799_P. sp. caprum         | -----                                                                   |               |     |     |     |
| OP738800_P. sp. rupicaprum     | -----                                                                   |               |     |     |     |
| OP738801_P. sp. suis           | -----                                                                   |               |     |     |     |
| OP738802_P. sp. suis           | -----                                                                   |               |     |     |     |
| OP738803_P. canis              | -----                                                                   |               |     |     |     |
| MT726217_P.canis_Ck1           | -----                                                                   |               |     |     |     |
| MT726216_P.canis_Ck2           | -----                                                                   |               |     |     |     |
| OP738804_P. sp. vespertilionis | -----                                                                   |               |     |     |     |
| OP738805_P. sp. soricis        | -----                                                                   |               |     |     |     |
| OP738806_P. leporis            | -----                                                                   |               |     |     |     |
| OP738807_P. oryctolagi         | -----                                                                   |               |     |     |     |
| NC_060319_P. oryctolagi        | -----                                                                   |               |     |     |     |
| OP738808_P. sp. equi           | -----                                                                   |               |     |     |     |
| OP738809_P. carinii            | TAAAGAATTTAACATCTGTAGAAATCAAAGGATTTT                                    | CAGCGTCTATTTT |     |     |     |
| JX499145_P. carinii            | TAAAGAATTTAACATCTGTAGAAATCAAAGGATTTT                                    | CAGCGTCTATTTT |     |     |     |
| JX499144_P. murina             | -----                                                                   |               |     |     |     |
| MT726212_P. sp. ludovicianus   | -----                                                                   |               |     |     |     |
| MT726214_P. sp. macacae        | -----                                                                   |               |     |     |     |
| JX855936_P. jirovecii          | -----                                                                   |               |     |     |     |

|                                | 290               | 300                |
|--------------------------------|-------------------|--------------------|
|                                | .. .... .... .... |                    |
| OP738797_P. sp. bovis          | -----             | TTTGTGTTAAG        |
| OP738798_P. sp. ovīs           | -----             | TTTGTGTTAAG        |
| OP738799_P. sp. caprum         | -----             | TTTGTGTTAAG        |
| OP738800_P. sp. rupicaprum     | -----             | TTTGTGTTAAG        |
| OP738801_P. sp. suis           | -----             | TTTGTGTTAAG        |
| OP738802_P. sp. suis           | -----             | TTTGTGTTAAG        |
| OP738803_P. canis              | -----             | TCTGTGCTAAG        |
| MT726217_P.canis_Ck1           | -----             | TCTGTGCTAAG        |
| MT726216_P.canis_Ck2           | -----             | TCTGTGCTAAG        |
| OP738804_P. sp. vespertilionis | -----             | TCTGTGCTAAG        |
| OP738805_P. sp. soricis        | -----             | TTTGTGCTAAG        |
| OP738806_P. leporis            | -----             | TTTGTGCTAAG        |
| OP738807_P. oryctolagi         | -----             | TTTGTGCTAAG        |
| NC_060319_P. oryctolagi        | -----             | TTTGTGCTAAG        |
| OP738808_P. sp. equi           | -----             | TTTGTGTTAAG        |
| OP738809_P. carinii            |                   | CTAGAAATTTGTGCTAAG |
| JX499145_P. carinii            |                   | CTAGAAATTTGTGCTAAG |
| JX499144_P. murina             | -----             | TTTGTGCTAAG        |
| MT726212_P. sp. ludovicianus   | -----             | TTTGTGCTAAG        |
| MT726214_P. sp. macacae        | -----             | TCTGTGCTAAG        |
| JX855936_P. jirovecii          | -----             | TCTGTGCTAAG        |
